# Supplementary material
Source: MDPI journal article supplement (https://www.mdpi.com/2304-6740/10/11/203)
Supplement: s1 [file s1]

## Supporting information for:

### Digold Phosphinine Complexes Are Stable with a Bis(Phosphinine) Ligand but Not with a 2-Phosphinophosphinine

Peter A. Cleaves, Ben Gourlay, Margot Marseglia, Daniel J. Ward and Stephen M. Mansell \*

Institute of Chemical Sciences, School of Engineering and Physical Sciences, Heriot-Watt University, Edinburgh, EH14 4AS, UK

\* Correspondence: s.mansell@hw.ac.uk; Tel.: +44-131-451-4299

## Contents

|                                                                                                                    |   |
|--------------------------------------------------------------------------------------------------------------------|---|
| [(AuCl) <sub>2</sub> [bis{3-methyl-6-(trimethylsilyl)phosphinine-2-yl}dimethylsilane]] ( <b>21</b> ).....          | 1 |
| Comparison of <sup>31</sup> P{ <sup>1</sup> H} NMR spectra for diphosphinine + 1 and 2 equivs of [AuCl(tht)] ..... | 5 |
| Variable NMR spectra of mono gold complex <b>20</b> .....                                                          | 6 |
| Reaction of 1 equiv. [AuCl(tht)] with phosphinophosphinine <b>22</b> .....                                         | 6 |
| Reaction of 2 equivs [AuCl(tht)] with phosphinophosphinine <b>22</b> .....                                         | 7 |
| Reaction of 2 equivs [AuCl(SMe <sub>2</sub> )] with phosphinophosphinine <b>22</b> under wet conditions.....       | 7 |
| Crystallographic details.....                                                                                      | 8 |

### [(AuCl)<sub>2</sub>[bis{3-methyl-6-(trimethylsilyl)phosphinine-2-yl}dimethylsilane]] (**21**)

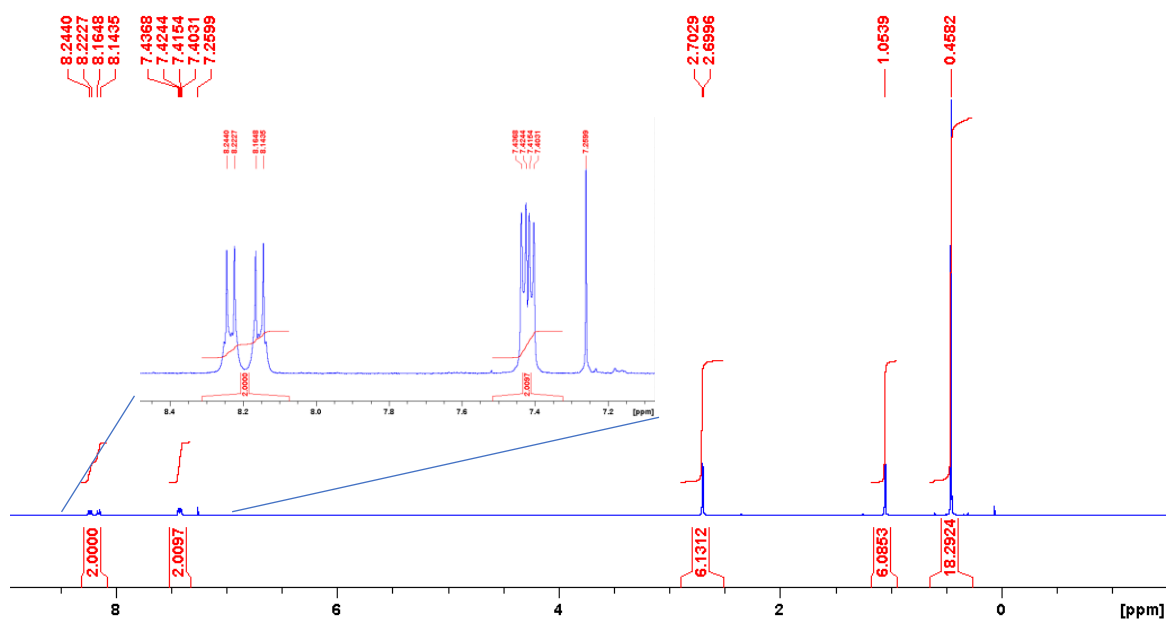

Figure S1. <sup>1</sup>H NMR (400 MHz, CDCl<sub>3</sub>, 298 K) spectrum of **21**.

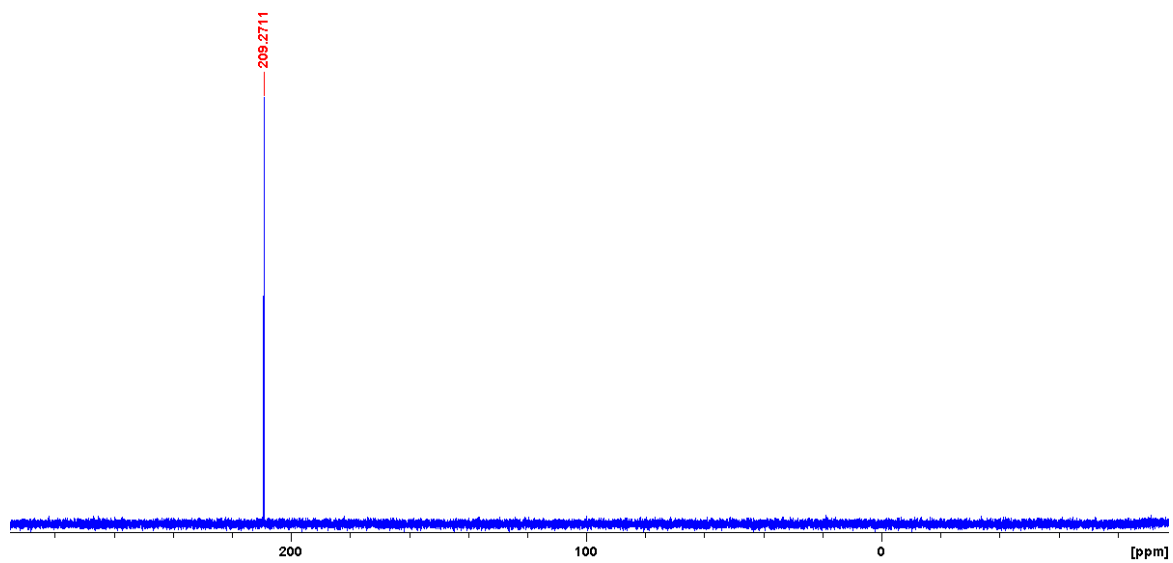

**Figure S2.**  $^{31}\text{P}\{^1\text{H}\}$  NMR (162 MHz,  $\text{CDCl}_3$ , 298 K) spectrum of **21**.

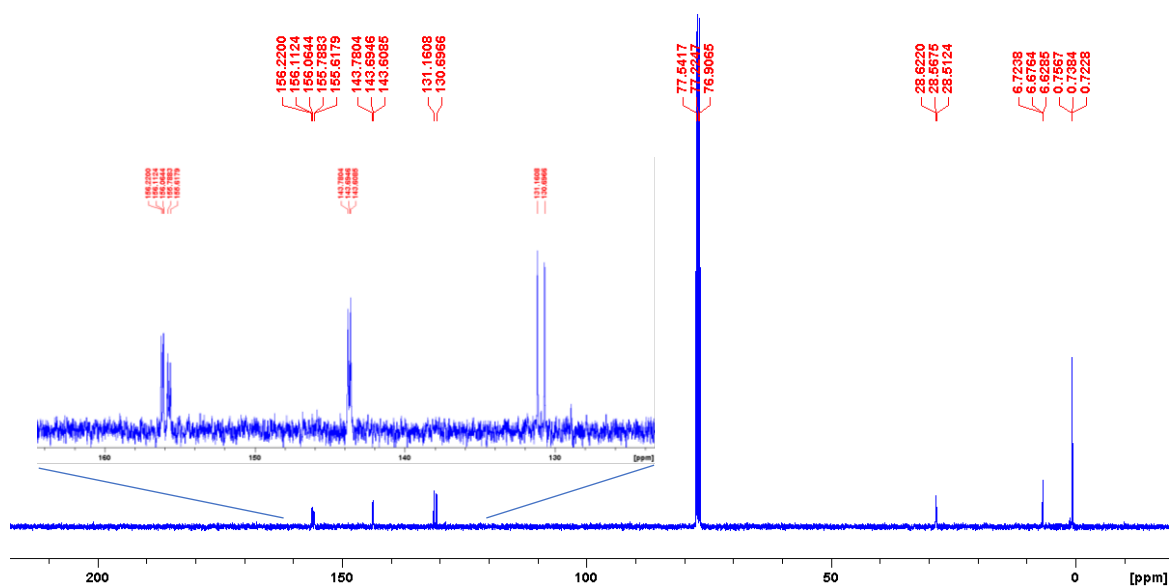

**Figure S3.**  $^{13}\text{C}\{^1\text{H}\}$  NMR (100.6 MHz,  $\text{CDCl}_3$ , 298 K) spectrum of **21**.

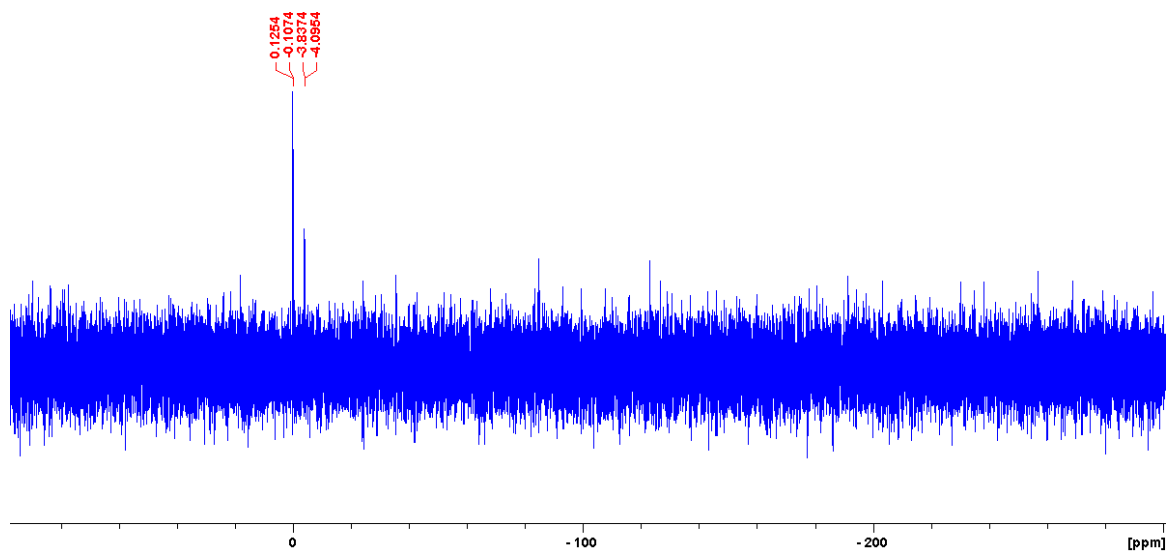

**Figure S4.**  $^{29}\text{Si}\{^1\text{H}\}$  NMR (79.5 MHz,  $\text{CDCl}_3$ , 298 K) spectrum of **21**.

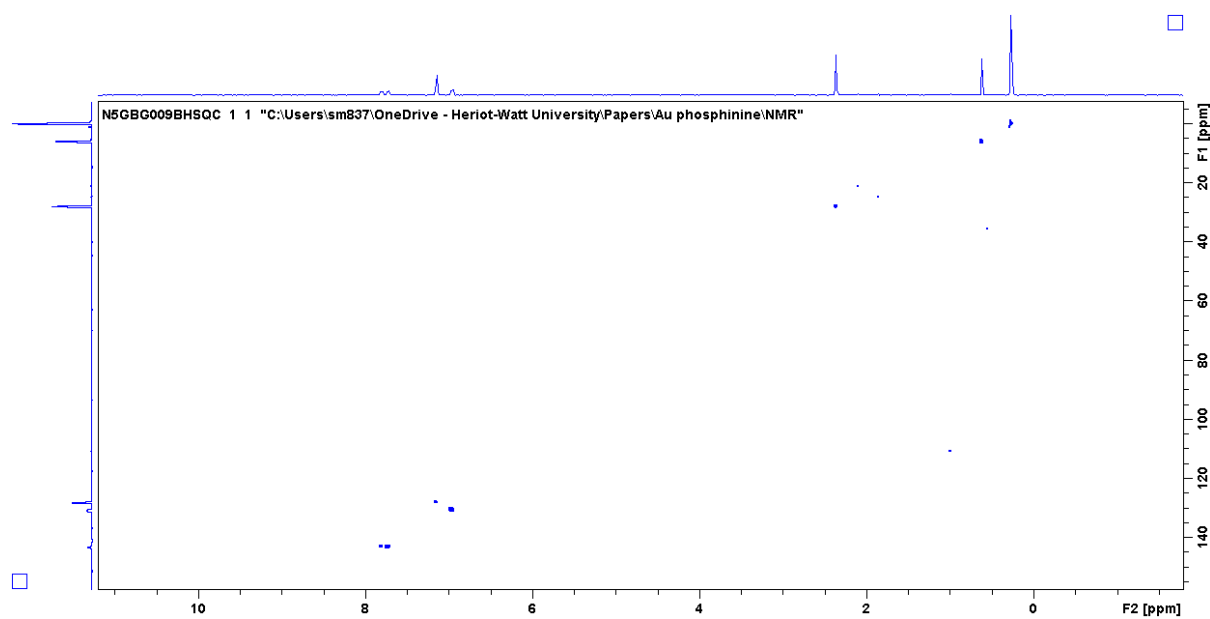

**Figure S5.** HSQC spectrum ( $\text{C}_6\text{D}_6$ ) used to assign *para* and *meta* phosphinine C-H for **21**.

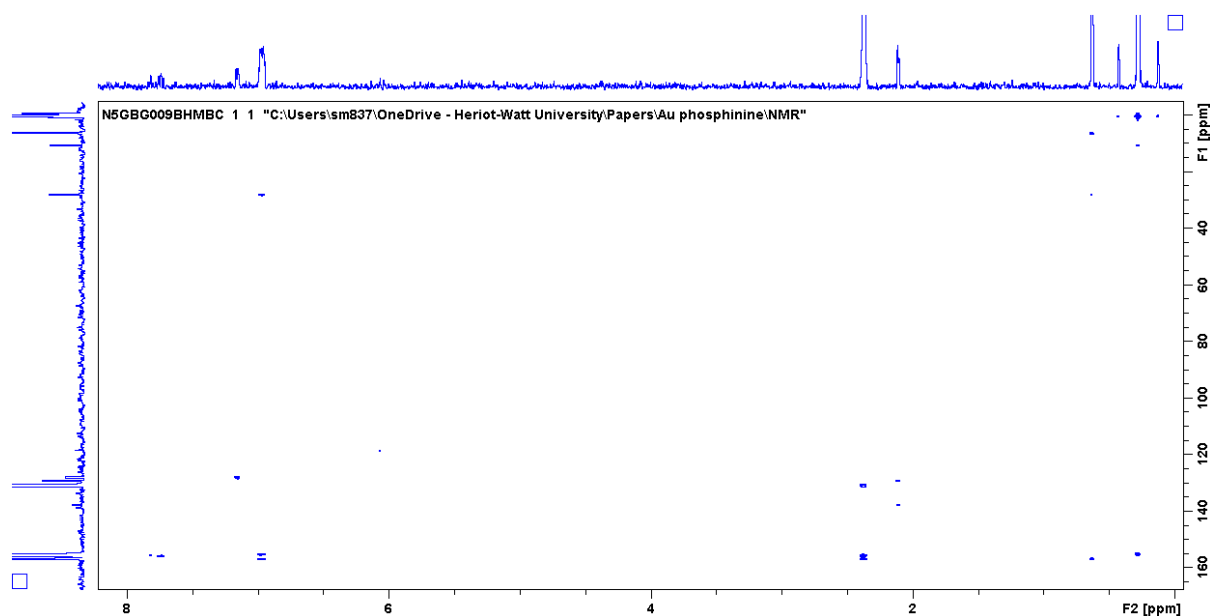

**Figure S6.** HMBC spectrum ( $C_6D_6$ ) used to assign the two *ortho*-C in **21** from coupling to  $SiMe_3$  and  $SiMe_2$ .

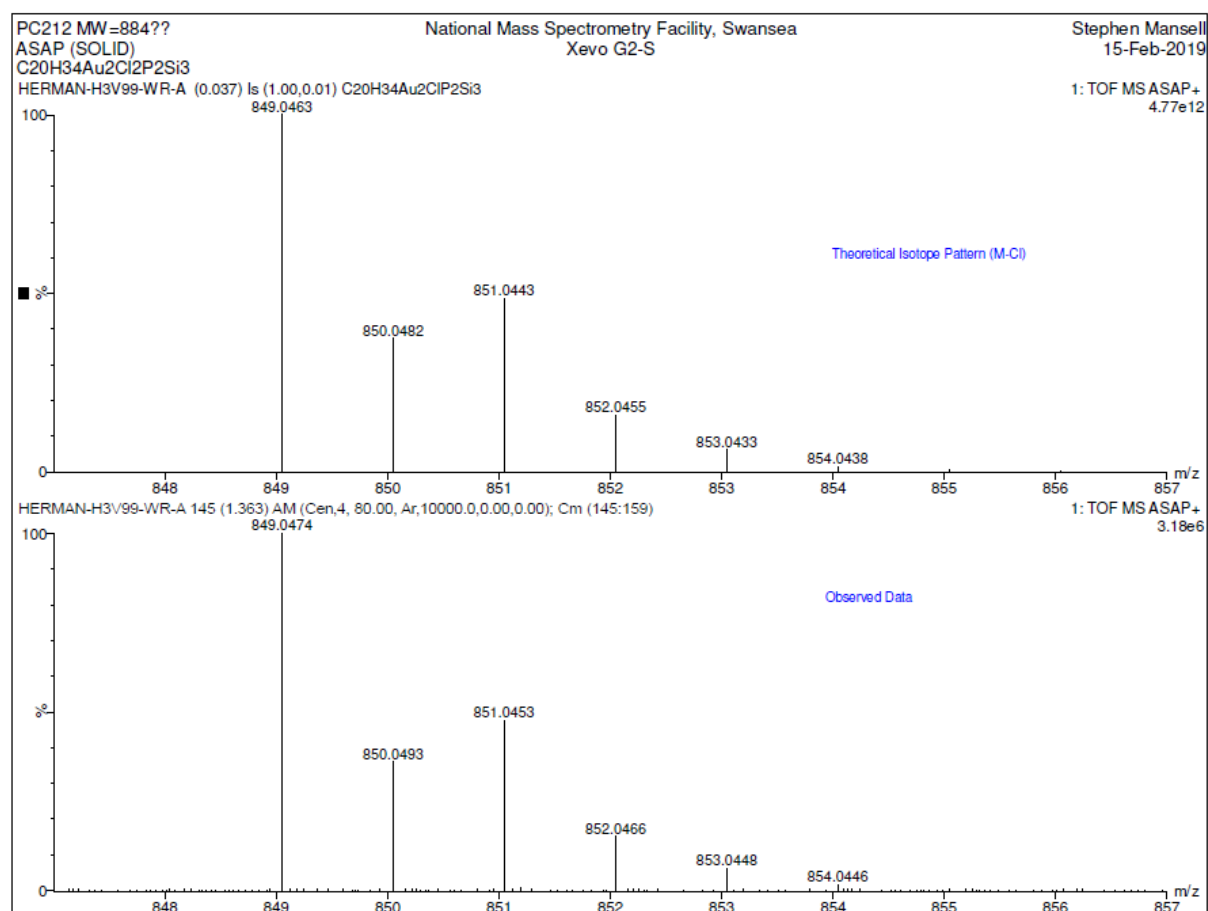

**Figure S7.** Accurate mass and isotope distribution for M-Cl (**21**).

Comparison of  $^{31}\text{P}\{^1\text{H}\}$  NMR spectra for diphosphinine + 1 and 2 equivalents of  $[\text{AuCl}(\text{tht})]$

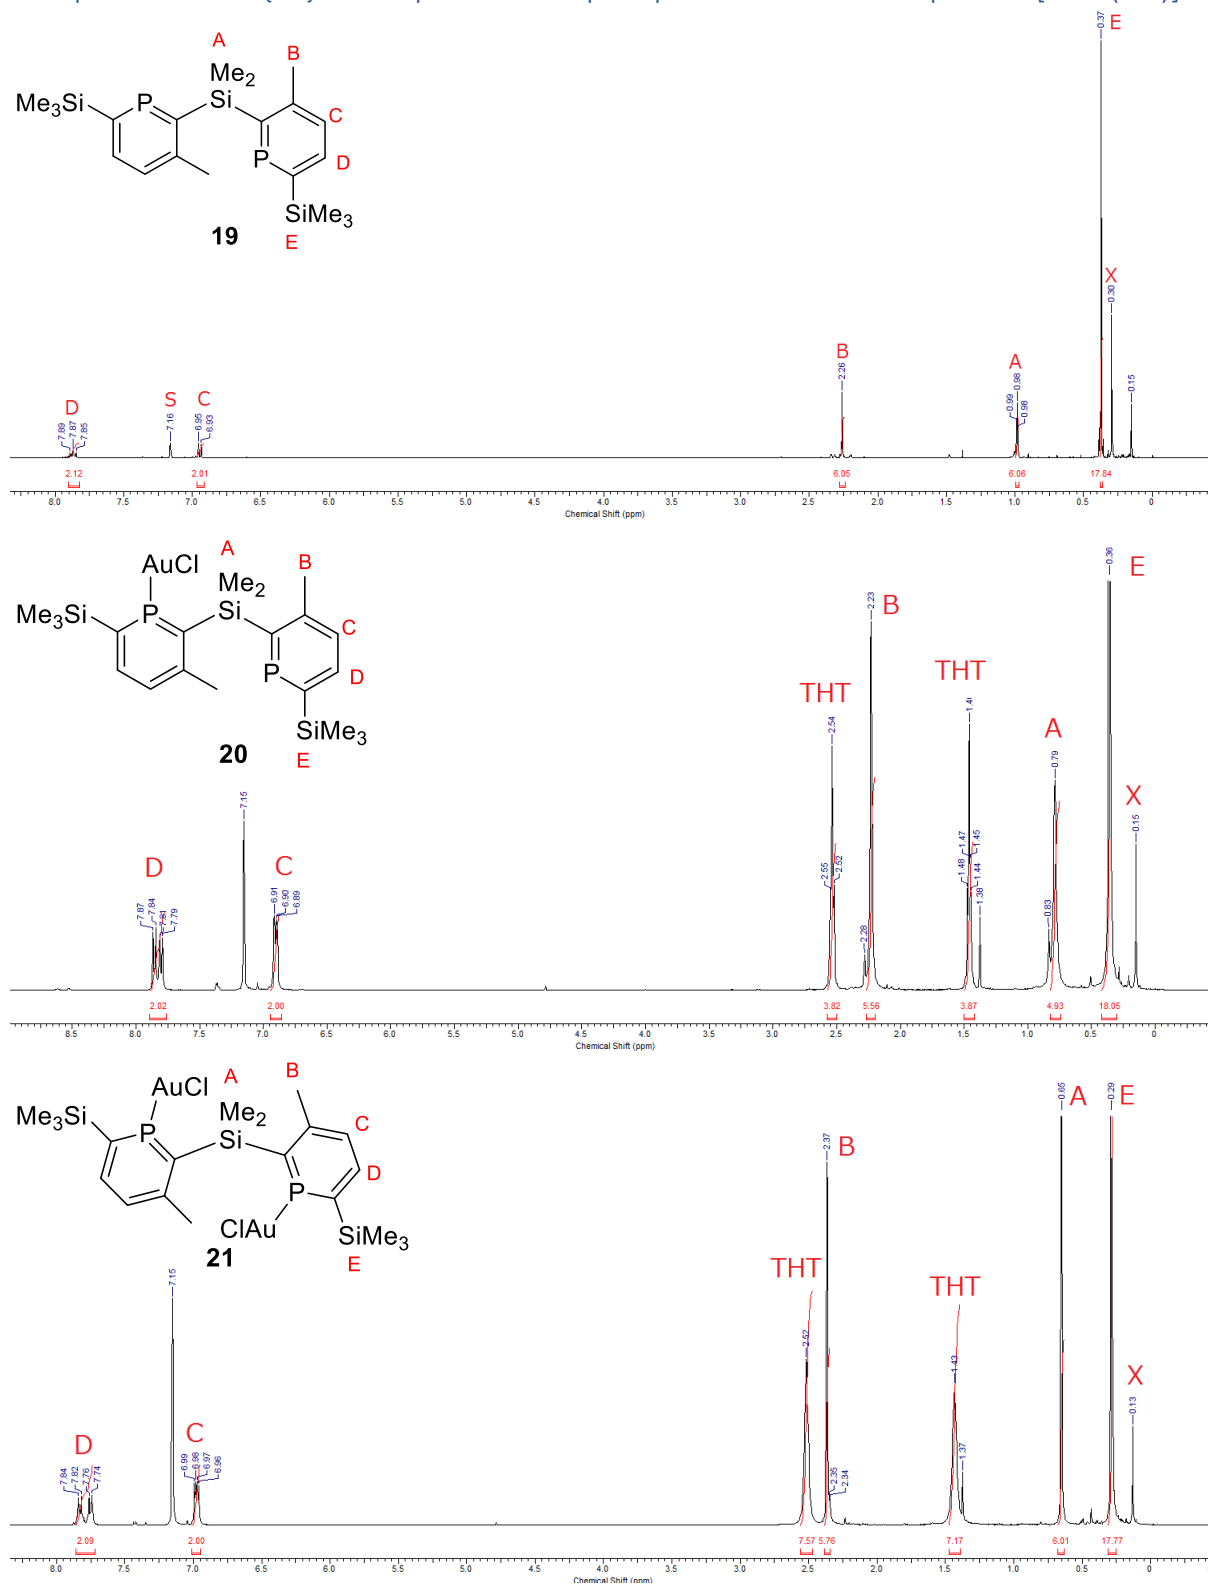

**Figure S8.** Comparison of  $^1\text{H}$  NMR spectra ( $\text{C}_6\text{D}_6$ ) for diphosphinine **19** (top) with the products formed after addition of one (**20**, middle) and two (**21**, bottom) equivalents of  $[\text{AuCl}(\text{tht})]$ . X = silicon grease impurity. S = residual protio solvent peak in deuterated solvent.

## Variable temperature $^{31}\text{P}\{^1\text{H}\}$ NMR spectra of mono gold complex **20**

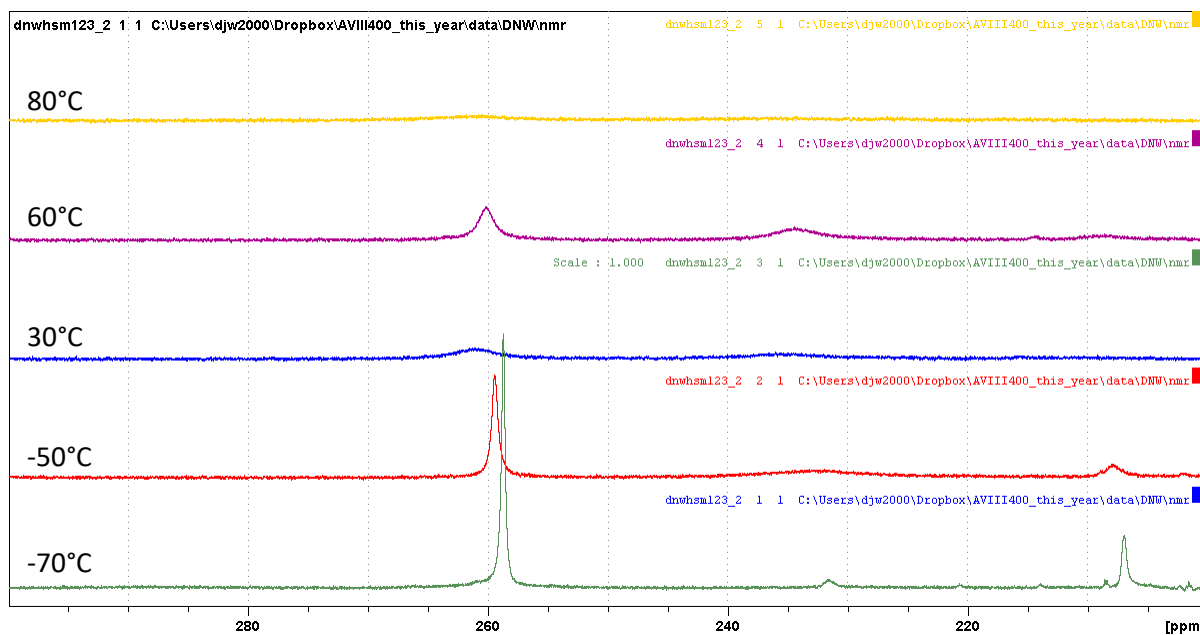

**Figure S9.** Stack plot of  $^{31}\text{P}\{^1\text{H}\}$  NMR spectra ( $\text{d}^8$ -toluene) of mono gold complex **20**. Yellow: 80°C, purple: 60°C, blue: 30°C, red: -50°C, green: -70°C.

## Reaction of 1 equiv. $[\text{AuCl}(\text{tht})]$ with phosphinophosphinine **22**.

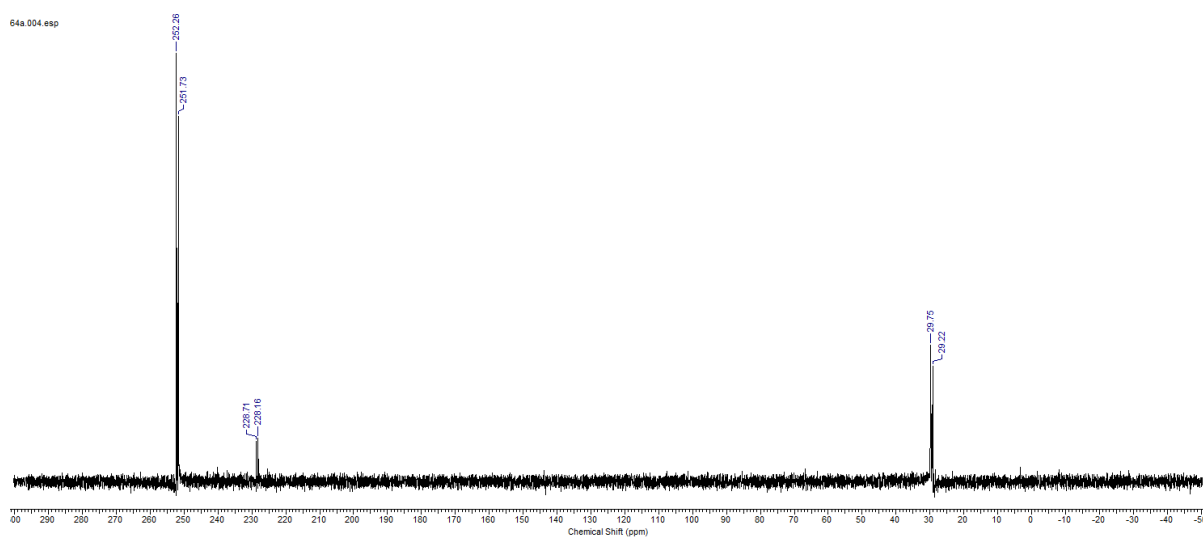

**Figure S10.**  $^{31}\text{P}\{^1\text{H}\}$  NMR (162 MHz,  $\text{CDCl}_3$ , 298 K) spectrum of **23**. Resonance at 226 ppm is from an unknown impurity.

Reaction of 2 equivs [AuCl(tht)] with phosphinophosphinine **22**.

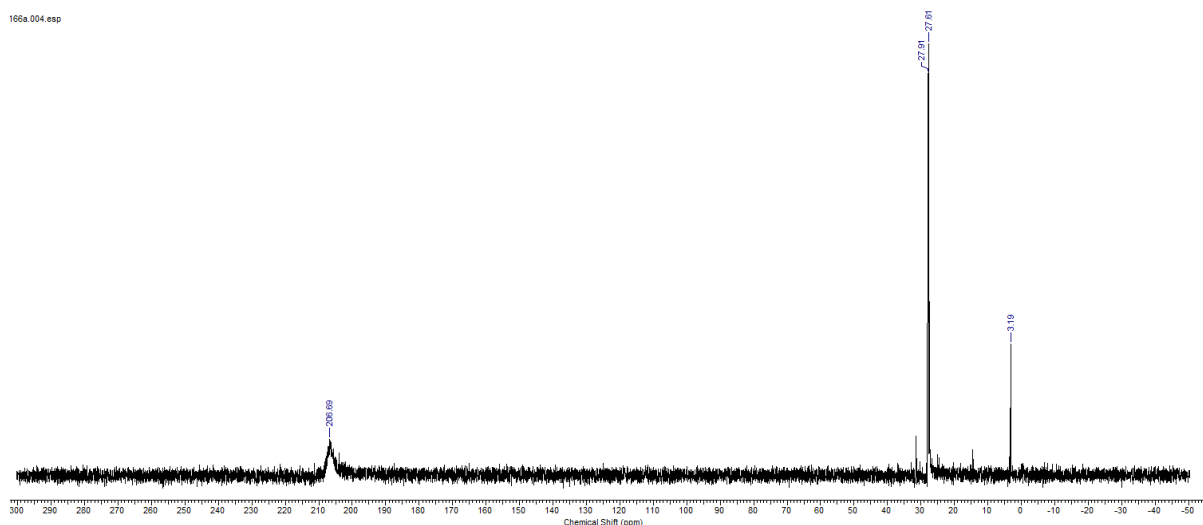

**Figure S11.**  $^{31}\text{P}\{^1\text{H}\}$  NMR (162 MHz,  $\text{C}_6\text{D}_6$ , 298 K) spectrum of **24**. Resonance at 3 ppm is from an unknown impurity.

Reaction of 2 equivs [AuCl(SMe<sub>2</sub>)] with phosphinophosphinine **22** under wet conditions.

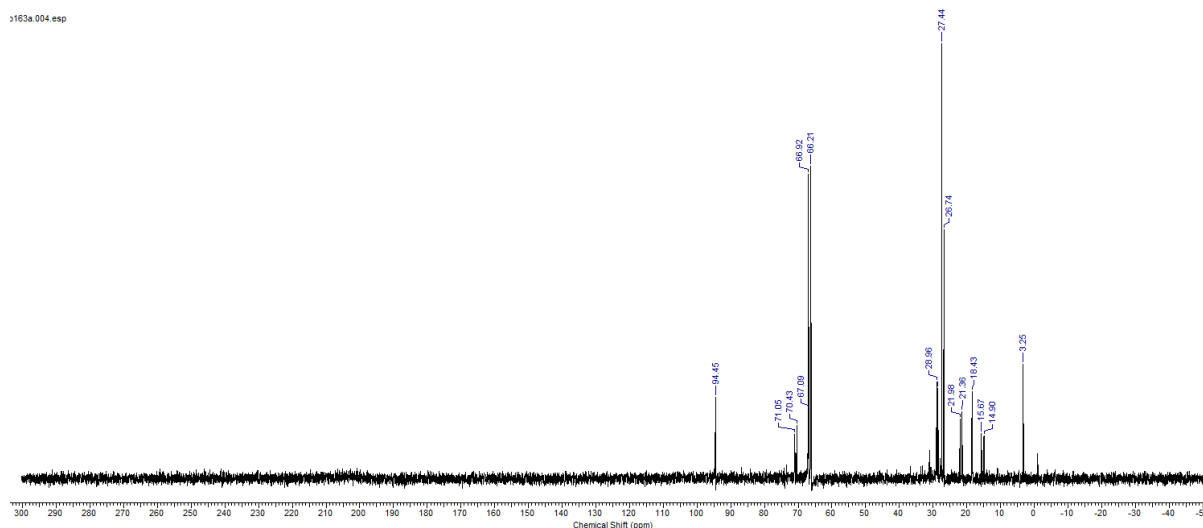

**Figure S12.**  $^{31}\text{P}\{^1\text{H}\}$  NMR (162 MHz,  $\text{C}_6\text{D}_6$ , 298 K) spectrum of **25** + other products.

## Crystallographic details

**Table S1.** Additional crystallographic data.

|                                                              | <b>21</b>                                                                                      | <b>25·CHCl<sub>3</sub></b>                                                      |
|--------------------------------------------------------------|------------------------------------------------------------------------------------------------|---------------------------------------------------------------------------------|
| Empirical formula                                            | C <sub>20</sub> H <sub>34</sub> Au <sub>2</sub> Cl <sub>2</sub> P <sub>2</sub> Si <sub>3</sub> | C <sub>19</sub> H <sub>19</sub> Au <sub>2</sub> Cl <sub>5</sub> OP <sub>2</sub> |
| Formula weight                                               | 885.51                                                                                         | 896.46                                                                          |
| T/K                                                          | 100.0                                                                                          | 100.0                                                                           |
| Crystal system                                               | monoclinic                                                                                     | triclinic                                                                       |
| Space group                                                  | <i>C2/c</i>                                                                                    | <i>P</i> -1                                                                     |
| <i>a</i> /Å                                                  | 12.4701(6)                                                                                     | 7.9896(6)                                                                       |
| <i>b</i> /Å                                                  | 11.9976(8)                                                                                     | 12.4698(9)                                                                      |
| <i>c</i> /Å                                                  | 20.0484(10)                                                                                    | 12.7913(9)                                                                      |
| $\alpha$ /°                                                  | 90                                                                                             | 96.440(4)                                                                       |
| $\beta$ /°                                                   | 103.264(2)                                                                                     | 98.276(3)                                                                       |
| $\gamma$ /°                                                  | 90                                                                                             | 99.158(3)                                                                       |
| Volume/Å <sup>3</sup>                                        | 2919.4(3)                                                                                      | 1233.08(16)                                                                     |
| <i>Z</i>                                                     | 4                                                                                              | 2                                                                               |
| $\rho_{\text{calc}}$ /cm <sup>3</sup>                        | 2.015                                                                                          | 2.414                                                                           |
| $\mu$ /mm <sup>1</sup>                                       | 22.576                                                                                         | 12.566                                                                          |
| <i>F</i> (000)                                               | 1672.0                                                                                         | 828.0                                                                           |
| Crystal size/mm <sup>3</sup>                                 | 0.32 × 0.3 × 0.12                                                                              | 0.4 × 0.36 × 0.34                                                               |
| Radiation                                                    | CuK $\alpha$ ( $\lambda$ = 1.54178)                                                            | MoK $\alpha$ ( $\lambda$ = 0.71073)                                             |
| 2 $\theta$ range for data collection/°                       | 9.064 to 155.152                                                                               | 5.236 to 66.582                                                                 |
| Index ranges                                                 | -15 ≤ <i>h</i> ≤ 15, -15 ≤ <i>k</i> ≤ 13, -25 ≤ <i>l</i> ≤ 25                                  | -12 ≤ <i>h</i> ≤ 12, -19 ≤ <i>k</i> ≤ 19, -19 ≤ <i>l</i> ≤ 19                   |
| Reflections collected                                        | 29676                                                                                          | 34735                                                                           |
| Independent reflections                                      | 3074 [ <i>R</i> <sub>int</sub> = 0.0281, <i>R</i> <sub>sigma</sub> = 0.0143]                   | 9332 [ <i>R</i> <sub>int</sub> = 0.0477, <i>R</i> <sub>sigma</sub> = 0.0491]    |
| Data/ restraints/ parameters                                 | 3074/0/138                                                                                     | 9332/0/264                                                                      |
| Goodness-of-fit on <i>F</i> <sup>2</sup>                     | 1.210                                                                                          | 1.034                                                                           |
| Final <i>R</i> indexes [ <i>I</i> ≥ 2 $\sigma$ ( <i>I</i> )] | <i>R</i> <sub>1</sub> = 0.0322, <i>wR</i> <sub>2</sub> = 0.0874                                | <i>R</i> <sub>1</sub> = 0.0295, <i>wR</i> <sub>2</sub> = 0.0578                 |
| Final <i>R</i> indexes [all data]                            | <i>R</i> <sub>1</sub> = 0.0322, <i>wR</i> <sub>2</sub> = 0.0874                                | <i>R</i> <sub>1</sub> = 0.0425, <i>wR</i> <sub>2</sub> = 0.0612                 |
| Largest diff. peak/hole (e Å <sup>-3</sup> )                 | 2.10/-2.47                                                                                     | 1.36/-1.78                                                                      |
